# Supplementary material for: The effect of platelet lysate in culture of PDLSCs: an in vitro comparative study
Source: PeerJ. 2019 Aug 8;7:e7465. doi: 10.7717/peerj.7465 (PMC6689390; doi:10.7717/peerj.7465)
Supplement: Table S2 — Raw data of surface markers analysis of PDLSCs extracted by two different methods and treated with different serum types at P3. [file peerj-07-7465-s003.xls]

## Sheet: Sheet1
			FBS							PL
		CD73	CD105	CD44	CD90	Negative Cocktail			CD73	CD105	CD44	CD90	Negative Cocktail
	PDL-Enz	0.999	0.962	0.991	0.995	0.001		PDL-Enz	0.998	0.925	0.974	0.992	0.004
	PDL-EnzB	0.998	0.935	0.991	0.997	0.001		PDL-EnzB	0.999	0.968	0.994	1	0.005
	PDL-EnzC	0.999	0.967	0.998	0.999	0.002		PDL-EnzC	0.99	0.84	0.91	0.972	0.005
		0.998667	0.954667	0.993333	0.997	0.00133333			0.995667	0.911	0.959333	0.988	0.00466667
			FBS							PL
		CD73	CD105	CD44	CD90	Negative Cocktail			CD73	CD105	CD44	CD90	Negative Cocktail
	PDL-Exp A	1	0.99	0.99	1	0.03		PDL-Exp A	1	0.99	0.96	0.99	0.03
	PDL-ExB	0.982	0.931	0.984	0.984	0.07		PDL-ExB	1	0.963	0.999	0.994	0.004
	PDL-EXC	0.98	0.92	0.98	0.98	0.003		PDL-EXC	0.996	0.92	0.992	0.962	0.003
		0.987333	0.947	0.984667	0.988	0.0343333			0.998667	0.957667	0.983667	0.982	0.0123333
