# Supplementary material for: The effect of platelet lysate in culture of PDLSCs: an in vitro comparative study
Source: PeerJ. 2019 Aug 8;7:e7465. doi: 10.7717/peerj.7465 (PMC6689390; doi:10.7717/peerj.7465)
Supplement: Table S3 — Raw data of cell proliferation assay of PDLSCs extracted by two different methods and treated with different serum types at P3. [file peerj-07-7465-s004.xlsx]

## Sheet: Sheet1
				ENZYME-A									Exp-A
		Treeatment	day1	day2	day3	day4	day5	day6	day7		Treatment	day1	day2	day3	day4	day5	day6	day7
		FBS	0.113	0.146667	0.175	0.196667	0.292667	0.398	0.577333		FBS	0.155667	0.176667	0.197333	0.177667	0.216667	0.181733	0.313667
		PL	0.151	0.186333	0.233667	0.374	0.369	0.4315	0.6045		PL	0.184	0.181667	0.216333	0.235	0.267667	0.273333	0.343333
		SFM	0.0926667	0.088	0.0912333	0.065	0.068	0.0666667	0.0653333		SFM	0.118	0.09	0.085	0.0793333	0.068	0.0686667	0.0683333
				ENZYME-B
		Treatment	day1	day2	day3	day4	day5	day6	day7				Exp-B
		FBS	0.119333	0.16	0.251	0.281	0.485	0.570667	0.642		Treatment	day1	day2	day3	day4	day5	day6	day7
		PL	0.112333	0.188333	0.227	0.231333	0.395667	0.395667	0.398667		FBS	0.161667	0.193667	0.206333	0.307	0.375667	0.467667	0.626
		SFM	0.0733333	0.0793333	0.0886667	0.0613333	0.0733333	0.0756667	0.076		PL	0.170333	0.311667	0.274667	0.474333	0.357333	0.481333	0.421
											SFM	0.185333	0.075	0.214333	0.078	0.0646667	0.0723333	0.071
				ENZYME-C
		Concentration	day1	day2	day3	day4	day5	day6	day7				EXP-C
		FBS	0.118333	0.144667	0.214	0.261	0.564667	0.601667	0.765333		Treatment	day1	day2	day3	day4	day5	day6	day7
		PL	0.149667	0.179	0.264333	0.300333	0.449333	0.579667	0.975333		FBS	0.235667	0.158333	0.196333	0.261	0.314333	0.510333	0.667
		SFM	0.125333	0.0903333	0.09	0.0713333	0.0703333	0.0593333	0.0653333		PL	0.200667	0.257333	0.252667	0.290667	0.372333	0.429	0.6725
											SFM	0.125333	0.123667	0.103	0.0763333	0.0693333	0.0706667	0.0706667
