# Supplementary material for: The effect of platelet lysate in culture of PDLSCs: an in vitro comparative study
Source: PeerJ. 2019 Aug 8;7:e7465. doi: 10.7717/peerj.7465 (PMC6689390; doi:10.7717/peerj.7465)
Supplement: Table S6 — Raw data of the expression levels of osteogenic markers expressed by the isolated PDLSCs after 14 days of osteogenic differentiation compared to their Blank control. [file peerj-07-7465-s007.xlsx]

## Sheet: Sheet1
Name og Gene	Explant.PL-Cont									Explant.PL-Ost									Explant.FBS-Cont									Explant. FBS-Ost									Enzymatic.PL-Cont									Enzymatic.PL-Ost
OCN	0.309605	0.341273	0.280875	0.258547	0.283025	0.236187	0.810003	0.880869	0.744839	1.73971	1.99703	1.49896	3.4765	3.3761	3.1	1.72	1.718	1.9498	0.124008	0.164824	0.93299	0.102132	0.111028	0.93948	0.669428	0.644834	0.694959	1.28826	1.1028	1.49477	1.44937	2.53314	2.2928	3.62919	3.72217	2.71392	0.62219	0.61597	0.62848	0.40344	0.40639	0.040051	0.15445	0.54601	0.43689	1.67647	1.61432	1.74101	1.33832
OPN	0.29137	0.44749	0.18972	0.37356	0.33124	0.4213	0.26	0.584418	0.2	1.54	2.54	1.93	1.6	2.2	1.9	1.48	1.91	1.4	0.3813	0.4783	0.22688	0.402623	0.379981	0.426613	0.48	0.81	0.2879	1.675	2.79	1.09	1.339	1.92	1.06	1.83	1.411	1.8	0.784	0.694	0.886	0.63	0.651	0.61	0.15	0.1	0.2	1.61384	0.97	1.605	1.58
Cbfa-1	0.873876	1.43739	1.74594	1.54381	2.33432	1.11729	1.873	1.64086	1.79	1.64086	1.372	1.79502	2.16	2	2.05	2.04448	2.04448	4.11245	0.793059	0.478636	1.31403	1.22391	1.7207	0.870551	1.70002	1.70002	1.6498	1.76339	1.35282	1.65176	1.00452	2.55443	1.39502	1.78245	1.17824	2.86375	0.512456	1.21719	1.20916	1.72523	1.99516	1.52851	2.15579	2.15579	1.84	1.50892	1.2749	1.62	1.7482
ALP	3.16911	5.34573	2.38776	2.4302	1.46862	3.4467	3.59967	3.44876	2.82979	18.507	15.8125	13.2691	16.4263	13.7529	11.0043	7.33857	15.3406	10.084	2.00031	6.67945	8.63383	5.83204	3.17774	10.7034	7.78394	4.74695	2.76392	12.2101	20.5348	7.26015	13.615	12.6722	14.8906	15.5809	13.8825	8.02221	3.47554	1.3924	3.68075	1.39378	1.84557	2.2974	1.93	3.96412	1.94	13.4078	13.2636	17.7275	16.14
Osterix	0.300409	0.303549	0.297302	0.265737	0.542642	1.30134	1.73736	2.22258	0.869388	1.09733	3.61752	2.33432	2.22211	1.86856	2.64255	1.39959	1.10957	1.76541	0.486299	0.30305	0.384504	0.362236	0.307786	0.426317	2.28153	1.82766	2.8481	3.9422	3.83451	1.69461	1.63	1.59	3.198	3.02782	3.91768	3.14106	0.50206	0.418994	0.66662	0.5244	0.6615	0.4158	0.33032	0.039282	0.27776	1.19665	2.13613	2.95468	1.14229
Collagn type 2	0.943812	1.312	0.67	2.48	3.8	1.53	1.06807	2.09943	0.543367	2.86493	3.64016	2.2548	5.93016	4.13	5.17	4.26	2.11	3.35	1.11342	1.9834	2.43344	1.78594	2.66519	0.12946	0.262429	0.211686	0.325335	2.87488	3.74249	2.2084	4.85424	3.75238	3.55792	3.17194	4.13122	4.22531	1.85768	2.30377	1.49796	3.24349	0.066986	3.41134	1.14711	1.14063	1.15389	5.87057	5.79175	5.95045	3.09647
[truncated: 23 more columns]
